# Supplementary material
Source: publisher figshare collection journal article supplement (https://sage.figshare.com/ndownloader/files/17428385)
Supplement: Supplementary file [file 17428385]

**Supplementary table 1**

| Periportal ± bridging necrosis                                                                         | Score | Intralobular degeneration and focal necrosis                                                                                       | Score | Portal inflammation                                                    | Score | Fibrosis                                                    | Score |
|--------------------------------------------------------------------------------------------------------|-------|------------------------------------------------------------------------------------------------------------------------------------|-------|------------------------------------------------------------------------|-------|-------------------------------------------------------------|-------|
| None                                                                                                   | 0     | None                                                                                                                               | 0     | No portal inflammation                                                 | 0     | No fibrosis                                                 | 0     |
| Mild piecemeal necrosis                                                                                | 1     | Mild (acidophilic bodies, ballooning, degeneration and/or scattered foci of hepatocellular necrosis in <1/3 of lobules or nodules) | 1     | Mild (sprinkling of inflammatory cells in <1/3 of portal tracts)       | 1     | Fibrous portal expansion                                    | 1     |
| Moderate piecemeal necrosis (involves less than 50 percent of the circumference of most portal tracts) | 3     | Moderate (involvement of 1/3 to 2/3 of lobules or nodules)                                                                         | 3     | Moderate (increased inflammatory cells in 1/3 to 2/3 of portal tracts) | 3     | Bridging fibrosis (portal-portal or portal-central linkage) | 3     |
| Marked piecemeal necrosis (involves more than 50 percent of the circumference of most portal tracts)   | 4     | Marked (involvement of >2/3 lobules or nodules)                                                                                    | 4     | Marked (dense packing of inflammatory cells in >2/3 of portal tracts)  | 4     | Cirrhosis                                                   | 4     |
| Moderate piecemeal necrosis plus bridging necrosis                                                     | 5     |                                                                                                                                    |       |                                                                        |       |                                                             |       |
| Marked piecemeal necrosis plus bridging necrosis                                                       | 6     |                                                                                                                                    |       |                                                                        |       |                                                             |       |
| Multilobular necrosis                                                                                  | 10    |                                                                                                                                    |       |                                                                        |       |                                                             |       |

**Histological activity index (HAI) for chronic hepatitis.** The composite score is based on histologic assessment of periportal and/or bridging necrosis, intralobular degeneration and focal necrosis, portal inflammation, and fibrosis. A HAI (without the fibrosis component) of 1 – 3 indicates minimal hepatitis and is seen as histological remission in AIH. A score of 4 – 8 corresponds with mild hepatitis, 9 – 12 with moderate hepatitis, and 13 – 18 with severe hepatitis.
